# Supplementary material
Source: MDPI journal article supplement (https://www.mdpi.com/2227-9717/7/10/683)
Supplement: s1 [file s1]

## Supplementary

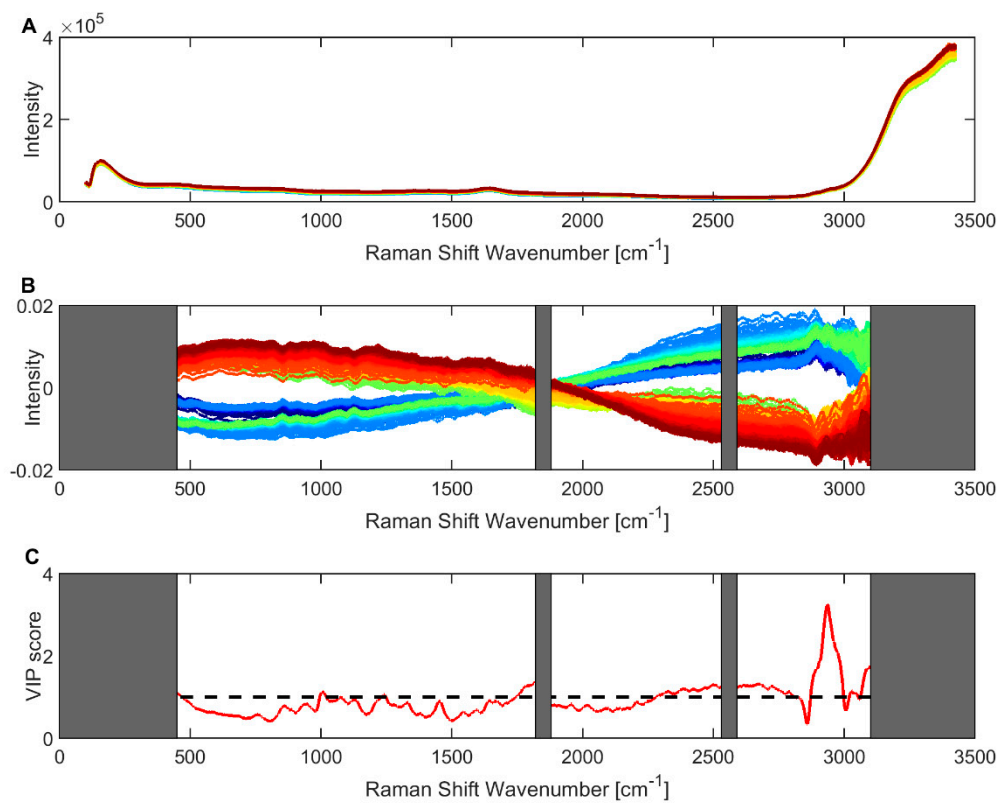

**Figure S1.** Acquired Raman spectra of the calibration set of ROT1: **A** contains the raw spectra **B** shows the pretreated spectra eliminating Raman shift wavenumber regions (100–450  $\text{cm}^{-1}$ , 1820–1880  $\text{cm}^{-1}$ , 2530–2590  $\text{cm}^{-1}$  and 3100–3425  $\text{cm}^{-1}$ ). **C** contains the Variable Importance in Projection of the calibrated PLS model for ROT1.
